# Supplementary material for: Improvement of lithium anode deterioration for ameliorating cyclabilities of non-aqueous Li–CO2 batteries
Source: Royal Society of Chemistry journal article supplement (doi:10.1039/d0nr00971g), 2020-01-01
Supplement: d0nr00971g1.pdf [file d0nr00971g1.pdf]

## Supplementary Information

### Improvement of Lithium Anode Deterioration for Ameliorating Cyclabilities of Non-aqueous Li-CO<sub>2</sub> Batteries

Chih-Jung Chen,<sup>a</sup> Jun-Jie Yang,<sup>b</sup> Chien-Hung Chen,<sup>b</sup> Da-Hua Wei,<sup>\*b</sup> Shu-Fen Hu<sup>\*c</sup>  
and Ru-Shi Liu<sup>\*ab</sup>

<sup>a</sup> *Department of Chemistry, National Taiwan University, Taipei 106, Taiwan*

<sup>b</sup> *Department of Mechanical Engineering and Graduate Institute of Manufacturing Technology, National  
Taipei University of Technology, Taipei 106, Taiwan*

<sup>c</sup> *Department of Physics, National Taiwan Normal University, Taipei 116, Taiwan*

\* E-mail: dhwei@ntut.edu.tw; sfhu.hu@ntnu.edu.tw; rsliu@ntu.edu.tw

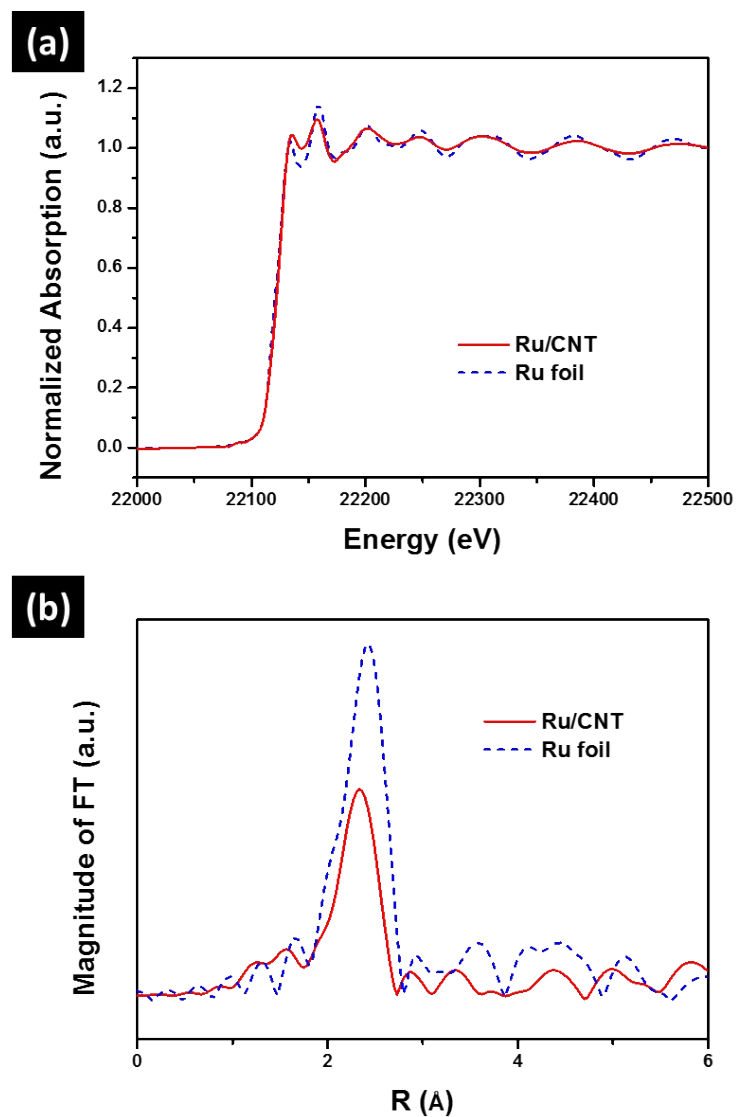

**Fig. S1** Mo K-edge (a) XANES spectra and (b) radial distribution for Fourier transform  $k^2$ -weighted EXAFS signal of Ru/CNT catalyst material and Ru foil standard.

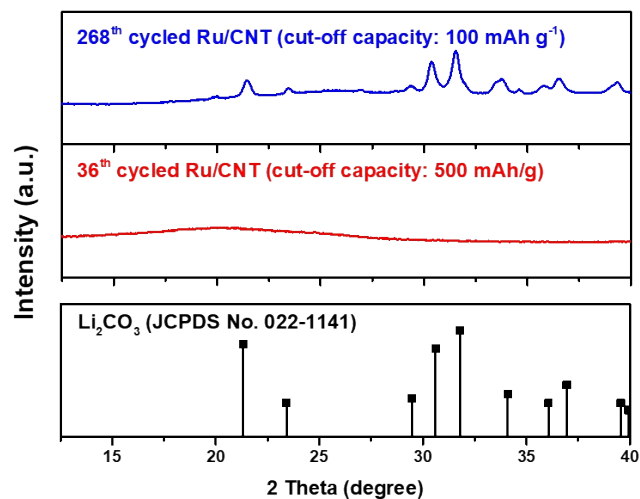

**Fig. S2** Ex-situ grazing incidence synchrotron XRD spectra of Ru/CNT catalyst cathode after the cycling test at a current density of 100 mA g<sup>-1</sup> with different cut-off capacity conditions.

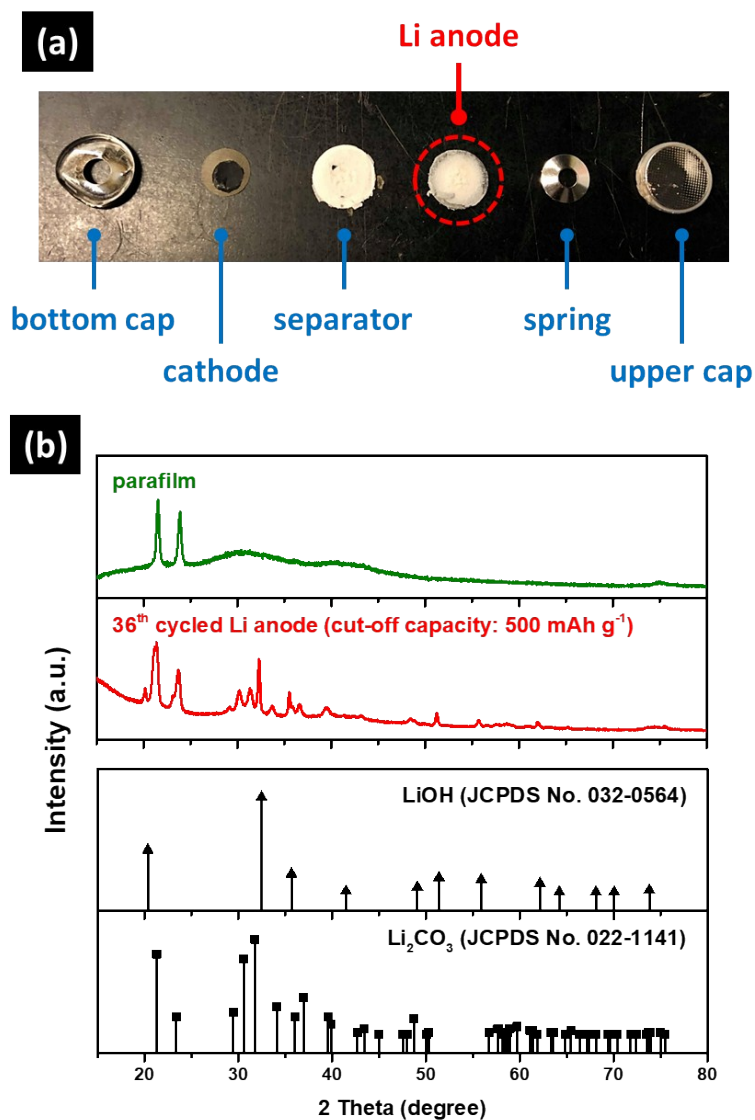

**Fig. S3** (a) Photograph of disassembled coin cell after cycling at a current density of 100 mA g<sup>-1</sup> with a cut-off capacity of 500 mAh g<sup>-1</sup>. (b) Ex-situ in-house XRD profile of Li anode after cycling measurement at a current density of 100 mA g<sup>-1</sup> under a cut-off capacity of 500 mAh g<sup>-1</sup>.

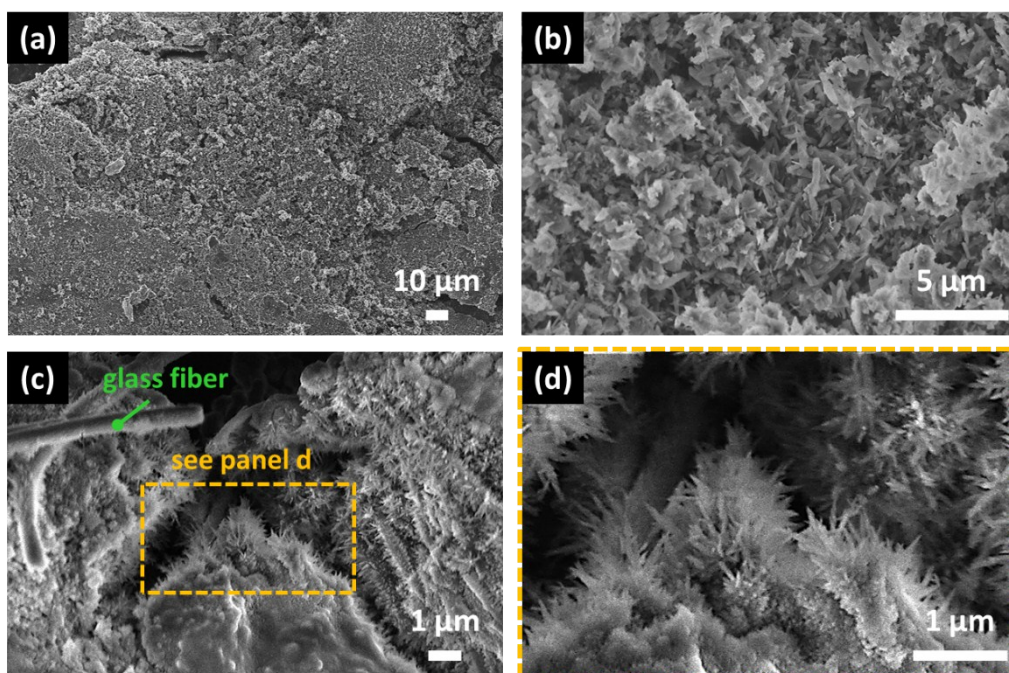

**Fig. S4** (a-d) SEM images with different magnifications of Li anode after the cycling measurement under a cut-off capacity of 500 mAh g<sup>-1</sup>.

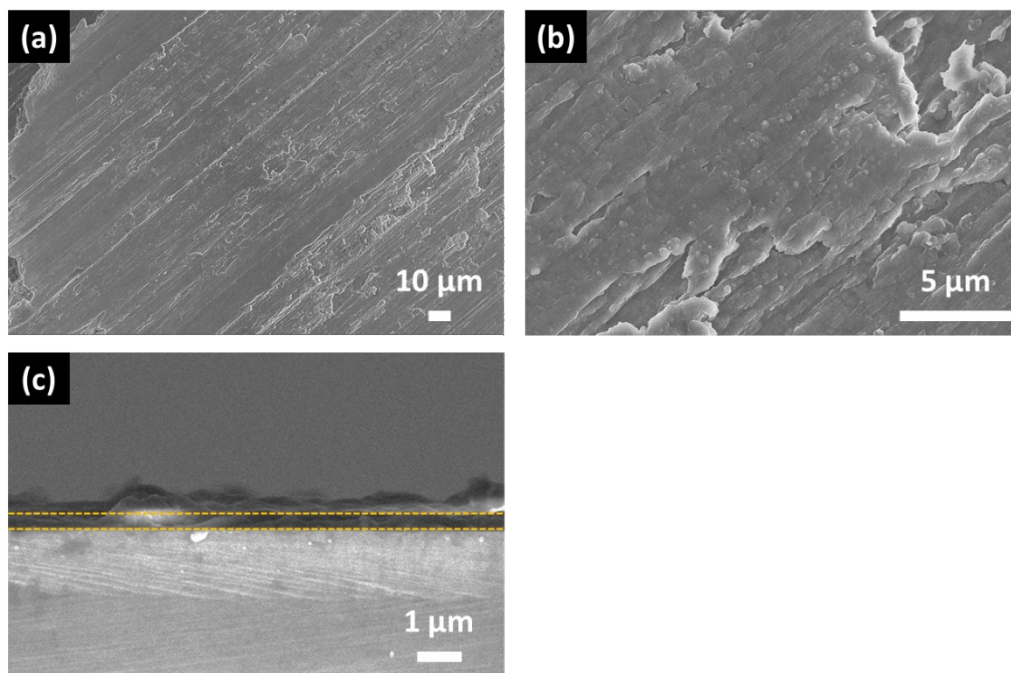

**Fig. S5** (a-b) SEM images with different magnifications of C/Li anode. (C) Cross-sectional SEM image of C thin film (in-between two orange dash lines) on Si wafer for the thickness estimation.

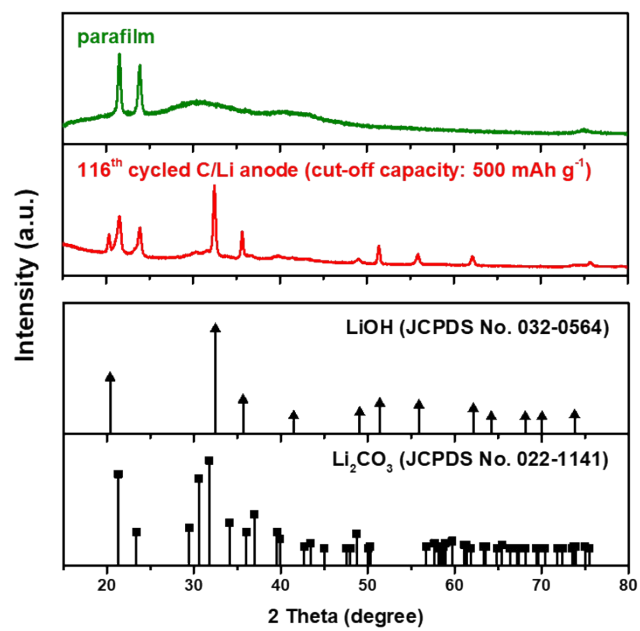

**Fig. S6** Ex-situ in-house XRD profile of C/Li anode after cycling measurement at a current density of 100 mA g<sup>-1</sup> under a cut-off capacity of 500 mAh g<sup>-1</sup>.

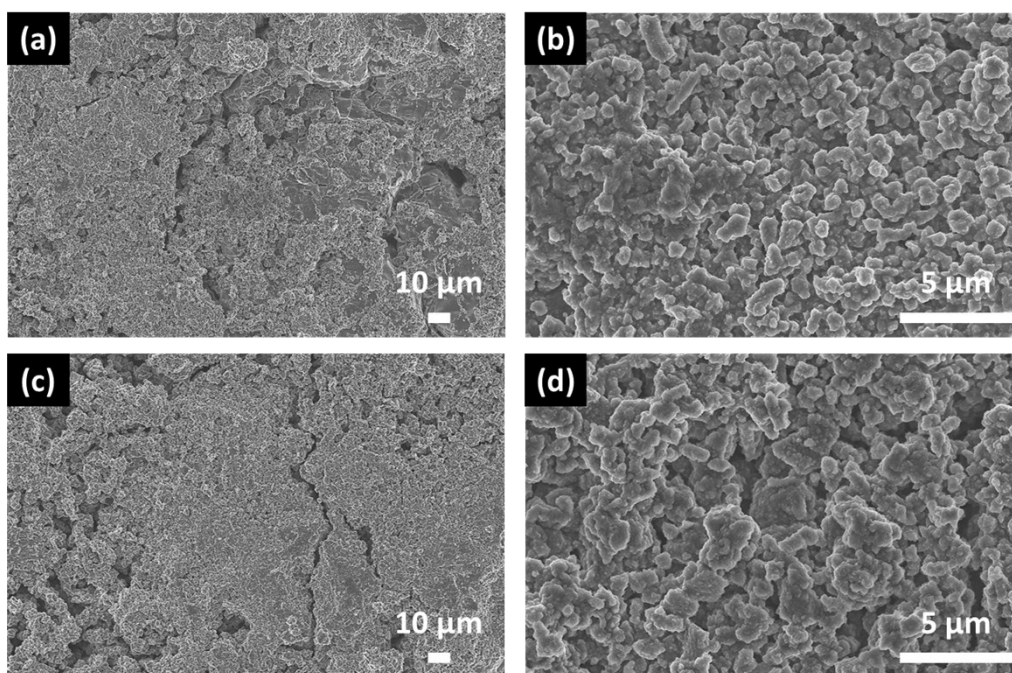

**Fig. S7** (a-d) SEM images with different magnifications of various regions on C/Li anode after the cycling measurement under a cut-off capacity of 500 mAh g<sup>-1</sup>.
